# Supplementary material for: Microcosm studies on the air–soil exchange of hexachlorobenzene and polychlorinated biphenyls
Source: Royal Society of Chemistry journal article supplement (doi:10.1039/b612361a), 2006-01-01
Supplement: b612361a.pdf [file b612361a.pdf]

Supplementary Information Table S1. Details of the soil treatments and basic parameters for the HCB experiment  
 (\* = removed from the chamber at t=63 days)

| Phase I (sampled days on 0, 14, 28 and 63) |          |          |               |             | Phase II (sampled on days 63, 77 and 110) |          |          |               |             |
|--------------------------------------------|----------|----------|---------------|-------------|-------------------------------------------|----------|----------|---------------|-------------|
| Soil                                       | Starting | Starting | Starting soil | Mixed (m)   | Soil                                      | Starting | Starting | Starting soil | Mixed (m)   |
| Code                                       | % SOM    | %WC      | mass (g)      | Unmixed (u) | Code                                      | % SOM    | %WC      | mass (g)      | Unmixed (u) |
| PI 1*                                      | 0.01     | 0.02     | 590           | m           |                                           |          |          |               |             |
| PI 2*                                      | 0.01     | 0.02     | 750           | m           |                                           |          |          |               |             |
| PI 3*                                      | 4.0      | 13       | 460           | m           |                                           |          |          |               |             |
| PI 4                                       | 4.0      | 13       | 460           | m           | PI/II 4                                   | 3.7      | 0.5      | 230           | m           |
| PI 5*                                      | 26       | 33       | 240           | m           |                                           |          |          |               |             |
| PI 6*                                      | 26       | 33       | 250           | m           |                                           |          |          |               |             |
| PI 7*                                      | 65       | 53       | 180           | m           |                                           |          |          |               |             |
| PI 8                                       | 65       | 53       | 180           | m           | PI/II 8                                   | 64       | 7.5      | 54            | m           |
|                                            |          |          |               |             | PII 9                                     | 0.01     | 0.09     | 400           | m           |
|                                            |          |          |               |             | PII 10                                    | 0.01     | 0.09     | 400           | m           |
|                                            |          |          |               |             | PII 11                                    | 4.0      | 13       | 390           | m           |
|                                            |          |          |               |             | PII 12                                    | 4.0      | 13       | 400           | m           |
|                                            |          |          |               |             | PII 13                                    | 65       | 52       | 140           | m           |
|                                            |          |          |               |             | PII 14                                    | 65       | 52       | 140           | m           |
|                                            |          |          |               |             | PII 15                                    | 4.0      | 13       | 410           | u           |
|                                            |          |          |               |             | PII 16                                    | 65       | 52       | 150           | u           |

%SOM = %soil organic matter; %WC = % of soil content which was water at t = 0.

Supplementary Information Table S2: Phase I data from a study with HCB and PCBs conducted over 105 days.

|          |      |           | ng/g DW         |                 |                 |                 | ng/g OM         |                 |                 |                 |    |
|----------|------|-----------|-----------------|-----------------|-----------------|-----------------|-----------------|-----------------|-----------------|-----------------|----|
| Compound | Days | Replicate | LO <sup>u</sup> | LO <sup>m</sup> | HO <sup>u</sup> | HO <sup>m</sup> | LO <sup>u</sup> | LO <sup>m</sup> | HO <sup>u</sup> | HO <sup>m</sup> |    |
|          |      |           |                 |                 |                 |                 | OM%             | 4.7             | 4.7             | 22              | 22 |
| HCB      | 0    | 1         | 0.2             | 0.2             | 0.7             | 0.7             | 4.5             | 4.5             | 3.1             | 3.1             |    |
|          |      | 2         | 0.2             | 0.2             | 0.6             | 0.6             | 4.6             | 4.6             | 3               | 3               |    |
|          | 27   | 1         | 14              | 16              | 120             | 160             | 300             | 330             | 540             | 720             |    |
|          |      | 2         | 12              |                 | 120             | 160             | 260             | na              | 560             | 750             |    |
|          | 57   | 1         | 64              | 63              | 130             | 236             | 1400            | 1400            | 630             | 1100            |    |
|          |      | 2         | 51              | 80              | na              | na              | 1100            | 1700            |                 |                 |    |
|          | 105  | 1         | 120             | 160             | 330             | 580             | 2600            | 3600            | 1500            | 2800            |    |
|          |      | 2         | 120             | 170             | 350             | 570             | 2600            | 3800            | 1700            | 2700            |    |
| PCB 28   | 0    | 1         | 0.1             | 0.1             | 0.6             | 0.6             | 1.2             | 1.2             | 2.7             | 2.7             |    |
|          |      | 2         | 0.0             | 0.0             | 0.6             | 0.6             | 0.9             | 0.9             | 3               | 3               |    |
|          | 27   | 1         | 2               | 3               | 10              | 15              | 46              | 63              | 44              | 71              |    |
|          |      | 2         | 2               | 3               | 78              | 13              | 42              | 64              | 36              | 62              |    |
|          | 57   | 1         | 22              | 22              | 20              | 36              | 470             | 480             | 93              | 170             |    |
|          |      | 2         | 16              | 20              | na              | na              | 340             | 450             |                 |                 |    |
|          | 105  | 1         | 45              | 70              | 59              | 490             | 990             | 1600            | 280             | 2400            |    |
|          |      | 2         | 44              | 63              | 51              | na              | 980             | 1400            | 240             | na              |    |
| PCB52    | 0    | 1         | 0.01            | 0.01            | 0.03            | 0.03            | 0.2             | 0.2             | 0.1             | 0.1             |    |
|          |      | 2         | 0.01            | 0.01            | 0.05            | 0.05            | 0.2             | 0.2             | 0.2             | 0.2             |    |
|          | 27   | 1         | 3.1             | 4.3             | 18              | 26              | 67              | 90              | 85              | 120             |    |
|          |      | 2         | 3.6             | 4.1             | 18              | 25              | 76              | 90              | 82              | 120             |    |
|          | 57   | 1         | 21              | 29              | 49              | 67              | 460             | 640             | 230             | 320             |    |
|          |      | 2         | na              | 29              | na              | na              |                 | 650             |                 |                 |    |
|          | 105  | 1         | 34              | 59              | 90              | 220             | 750             | 1300            | 430             | 1100            |    |
|          |      | 2         | 36              | 66              | 82              | 240             | 800             | 1500            | 390             | 1100            |    |
| PCB 153  | 0    | 1         | 0.1             | 0.1             | 0.1             | 0.1             | 1.4             | 1.4             | 0.7             | 0.7             |    |
|          |      | 2         | 0.1             | 0.1             | 0.2             | 0.2             | 1.6             | 1.6             | 0.8             | 0.8             |    |
|          | 27   | 1         | 0.7             | 1.1             | 3.7             | 2.3             | 14              | 24              | 17              | 11              |    |
|          |      | 2         | 1.2             | 1.1             | 4.0             | 1.5             | 25              | 23              | 19              | 7.2             |    |
|          | 57   | 1         | 3.4             | 4.1             | 7.3             | 8.0             | 73              | 90              | 35              | 38              |    |
|          |      | 2         | na              |    |
|          | 105  | 1         | 7.7             | 8.1             | 20              | 25              | 170             | 180             | 93              | 120             |    |
|          |      | 2         | 6.5             | 10              | 19              | 28              | 140             | 230             | 88              | 140             |    |
| PCB 180  | 0    | 1         | 0.03            | 0.03            | 0.03            | 0.03            | 0.6             | 0.6             | 0.1             | 0.1             |    |
|          |      | 2         | 0.03            | 0.03            | 0.03            | 0.03            | 0.7             | 0.7             | 0.2             | 0.2             |    |
|          | 27   | 1         | 0.4             | 1.1             | 0.8             | 0.7             | 8.5             | 24              | 3.9             | 3.3             |    |
|          |      | 2         | 0.4             | 1.1             | 0.8             | 0.9             | 9.4             | 23              | 3.6             | 4.1             |    |
|          | 57   | 1         | 1.0             | 0.8             | 1.3             | 1.4             | 22              | 17              | 6.0             | 6.5             |    |
|          |      | 2         | na              |    |
|          | 105  | 1         | 1.0             | 1.4             | 1.5             | 3.3             | 22              | 32              | 7.3             | 16              |    |
|          |      | 2         | 0.9             | 1.3             | 1.6             | 2.8             | 20              | 30              | 7.4             | 13              |    |

R: Replicates, u: unmixed, m: mixed, LO: Low organic matter soil, HO: High Organic matter soil

Supplementary Information Table S3: Independent Samples t-test results for selected compounds

|                | Day | CI    | t-test | ng/g DW basis  |      |                |       | ng/g OM basis  |       |                |      |
|----------------|-----|-------|--------|----------------|------|----------------|-------|----------------|-------|----------------|------|
|                |     |       |        | LO(u) vs LO(m) |      | HO(u) vs HO(m) |       | LO(u) vs LO(m) |       | HO(u) vs HO(m) |      |
| <b>HCB</b>     | 0   | 95%   | Lower  | na             |      | na             |       | -0.3           | 0.3   | -0.3           | 0.3  |
|                |     |       | Upper  | na             |      | na             |       | -0.3           | 0.3   | -0.3           | 0.3  |
|                | 27  | 95%   | Lower  | -25            | 19   | -25            | 19    | -490           | 390   | -262           | -107 |
|                |     |       | Upper  |                |      |                |       |                |       | -274           | -95  |
|                | 57  | 95%   | Lower  | -60            | 32   | -60            | 32    | -1212          | 617   | na             | Na   |
|                |     |       | Upper  | -63            | 35   | -63            | 35    | -1212          | 617   |                |      |
| 105            | 95% | Lower | -66    | -23            | -66  | -23            | -1530 | -669           | -1631 | -668           |      |
|                |     | Upper | -108   | 18             | -108 | 18             | -2370 | 170            | -1841 | -458           |      |
| <b>PCB 52</b>  | 0   | 95%   | Lower  | na             | na   | -0.06          | 0.06  | na             | na    | -0.3           | 0.3  |
|                |     |       | Upper  |                |      | -0.06          | 0.06  |                |       | -0.3           | 0.3  |
|                | 27  | 95%   | Lower  | -2             | 0.3  | -9             | -5    | -37            | 0.86  | -42            | -30  |
|                |     |       | Upper  | -2.1           | 1.1  | -13            | -1    | -75            | 38    | -55            | -17  |
|                | 57  | 95%   | Lower  | -8             | -8   | na             | na    | -295           | -74   | na             | na   |
|                |     |       | Upper  |                |      |                |       |                |       |                |      |
| 105            | 95% | Lower | -43    | -11            | -190 | -97            | -1068 | -181           | -776  | -603           |      |
|                |     | Upper | -60    | 5.9            | -223 | -64            | -1637 | 387            | -944  | -435           |      |
| <b>PCB 153</b> | 0   | 95%   | Lower  | na             | na   | na             | na    | -0.6           | 0.6   | na             | Na   |
|                |     |       | Upper  |                |      |                |       | -0.6           | 0.6   |                |      |
|                | 27  | 95%   | Lower  | -1.2           | 0.9  | -1             | 7     | -27            | 19    | -10            | 34   |
|                |     |       | Upper  | -3.3           | 3    | -9             | 14    | -71            | 63    | -43            | 67   |
|                | 57  | 95%   | Lower  | na             | na   | na             | na    | na             | na    | na             | na   |
|                |     |       | Upper  |                |      |                |       |                |       |                |      |
| 105            | 95% | Lower | -6.7   | 2              | -710 | 434            | -175  | 75             | -3368 | 2050           |      |
|                |     | Upper | -7.7   | 3.8            | -575 | 299            | -206  | 106            | -2729 | 1411           |      |

Supplementary Information Table S4. Summary of the data for Phase II of the experiment with the loading per tray and concentrations (ng/g DW and ng/g OM) +

|     |                                     | PI/II 4 <sup>*.m</sup> | PI/II 8 <sup>*.m</sup> | PII 9 <sup>m</sup> | PII 10 <sup>m</sup> | PII 11 <sup>m</sup> | PII 12 <sup>m</sup> | PII 13 <sup>m</sup> | PII 14 <sup>m</sup> | PII 15 <sup>u</sup> | PII 16 <sup>u</sup> |
|-----|-------------------------------------|------------------------|------------------------|--------------------|---------------------|---------------------|---------------------|---------------------|---------------------|---------------------|---------------------|
|     | <b>SOM%</b>                         | 4.0                    | 65                     | 0.01               | 0.01                | 4                   | 4                   | 65                  | 65                  | 4                   | 65                  |
| 63  | Soil mass in tray (DW) <sup>δ</sup> | 230                    | 50                     | 400                | 400                 | 340                 | 340                 | 70                  | 70                  | 350                 | 70                  |
|     | ng/tray (DW)                        | 40000                  | 69000                  | na                 | na                  | 16                  | 16                  | 160                 | 160                 | 16                  | 170                 |
|     | ng/g DW: <i>Replicate I</i>         | 220                    | 1200                   | BDL                | BDL                 | 0.05                | 0.05                | 2.2                 | 2.2                 | 0.05                | 2.2                 |
|     | <i>Replicate II</i>                 | 130                    | 1600                   | BDL                | BDL                 | 0.05                | 0.05                | 2.5                 | 2.5                 | 0.05                | 2.5                 |
|     | mean ng/g DW                        | 180                    | 1400                   | NA                 | NA                  | 0.05                | 0.05                | 2.4                 | 2.4                 | 0.05                | 2.35                |
|     | ng/g OM                             | 4300                   | 2200                   | NA                 | NA                  | 1.2                 | 1.2                 | 3.7                 | 3.7                 | 1.2                 | 3.7                 |
| 77  | Soil mass in tray (DW) <sup>δ</sup> | 230                    | 50                     | 400                | 400                 | 340                 | 340                 | 70                  | 70                  | 350                 | 70                  |
|     | ng/tray (DW)                        | 48000                  | 43000                  | 1500               | 1500                | 2400                | 2300                | 4600                | 4400                | 2300                | 4400                |
|     | ng/g DW: <i>Replicate I</i>         | 270                    | 880                    | 4                  | 4                   | 8                   | 7                   | 71                  | 77                  | 7                   | 80                  |
|     | <i>Replicate II</i>                 | 160                    | 870                    | 3                  | 4                   | 7                   | 6                   | 62                  | 56                  | 6                   | 46                  |
|     | mean ng/g DW                        | 210                    | 870                    | 4                  | 4                   | 8                   | 7                   | 67                  | 66                  | 7                   | 61                  |
|     | ng/g OM                             | 5100                   | 1400                   | 6200               | 13000               | 190                 | 180                 | 100                 | 100                 | 160                 | 94.5                |
| 110 | Soil mass in tray (DW) <sup>δ</sup> | 170                    | 40                     | 300                | 300                 | 240                 | 260                 | 53                  | 60                  | 290                 | 62                  |
|     | ng/tray (DW)                        | 19000                  | 24000                  | 2700               | 2400                | 2300                | 2000                | 3600                | 3600                | 3000                | 3100                |
|     | ng/g DW: <i>Replicate I</i>         | 120                    | 580                    | 10                 | 8                   | 11                  | 8                   | 81                  | 73                  | 11                  | 44                  |
|     | <i>Replicate II</i>                 | 98                     | 630                    | 8                  | 7                   | 8                   | 8                   | 53                  | 53                  | 10                  | 54                  |
|     | mean ng/g DW                        | 110                    | 610                    | 9                  | 8                   | 10                  | 8                   | 67                  | 63                  | 10                  | 50                  |
|     | ng/g OM                             | 2700                   | 970                    | 30000              | 20000               | 260                 | 230                 | 100                 | 99                  | 320                 | 77                  |

+ see Table 1 for treatment details. BDL= Below Detection Limit, NA: not available due to lack of concentration data, <sup>δ</sup> Soil mass in tray before sampling, \* Soil from Phase I, m: mixed, u: unmixed
